# Supplementary material for: Risk factors for new-onset diabetes mellitus after distal pancreatectomy
Source: HighWire-hosted journal article supplement (doi:10.1136/bmjdrc-2020-001778), 2020-10-01
Supplement: bmjdrc-2020-001778supp001_data_supplement.pdf [file bmjdrc-2020-001778supp001_data_supplement.pdf]

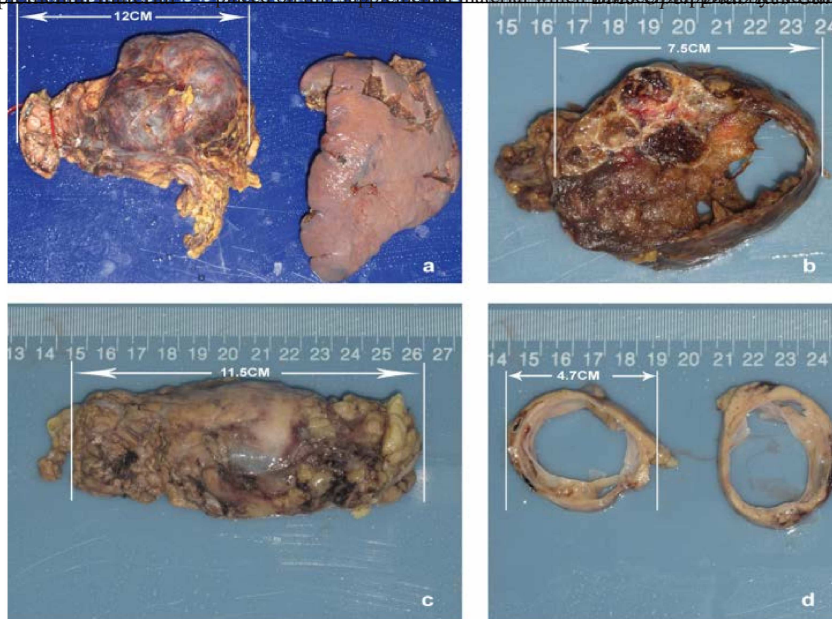

**Fig. 1 in Supplemental Material** Illustration for the method of calculating length of resected pancreas and size of lesion: length of resected pancreas in distal pancreatectomy with splenectomy (a); size of tumor in distal pancreatectomy with splenectomy (b); length of resected pancreas in spleen preserving distal pancreatectomy (c); size of tumor in spleen preserving distal pancreatectomy (d).
